# Supplementary material for: A Rapid LC-MS/MS Method for Simultaneous Determination of Ten Flavonoid Metabolites of Naringin in Rat Urine and Its Application to an Excretion Study
Source: MDPI journal article supplement (doi:10.3390/foods11030316), 2022-01-24
Supplement: s1 [file s1]

|       |         |       |        |        |       |       |       |        |        |        |        |
|-------|---------|-------|--------|--------|-------|-------|-------|--------|--------|--------|--------|
|       | 36-48 h | 1236  | 2213   | 2058   | 8.237 | 5.657 | 15.92 | 5.626  | 48.96  | 23.49  | 2.073  |
| Rat 5 | 0-4 h   | 208.5 | 17046  | 6899   | 3.390 | 3.489 | 4.132 | 0.9285 | 160.3  | 87.42  | 1.266  |
|       | 4-8 h   | 822.9 | 16648  | 9108   | 6.791 | 1.638 | 5.409 | 2.462  | 57.24  | 61.06  | 1.134  |
|       | 8-12 h  | 656.4 | 13865  | 27908  | 6.416 | 1.417 | 5.436 | 2.056  | 65.61  | 42.54  | < LLOQ |
|       | 12-24 h | 376.7 | 238.3  | 406.8  | 2.659 | 1.306 | 7.105 | 1.592  | 7.245  | 4.618  | < LLOQ |
|       | 24-36 h | 92.65 | < LLOQ | < LLOQ | 1.965 | 1.342 | 6.087 | 0.7865 | 5.876  | < LLOQ | < LLOQ |
|       | 36-48 h | 37.74 | < LLOQ | < LLOQ | 3.692 | 1.959 | 4.863 | 0.7631 | < LLOQ | < LLOQ | < LLOQ |

Table S2. Body weights (g) and urine sample volume (mL) of rats.

| Animals                     |         | Rat 1 | Rat 2 | Rat 3 | Rat 4 | Rat 5 |
|-----------------------------|---------|-------|-------|-------|-------|-------|
| Body weights (g)            |         | 356.5 | 358.4 | 321.5 | 398.1 | 338.1 |
| Urine sample<br>volume (mL) | 0-4 h   | 2.5   | 2.8   | 3.0   | 6.0   | 5.1   |
|                             | 4-8 h   | 4.3   | 2.9   | 4.1   | 0.8   | 6.4   |
|                             | 8-12 h  | 5.0   | 4.0   | 3.8   | 0.0   | 3.8   |
|                             | 12-24 h | 7.0   | 11.8  | 17.5  | 8.9   | 15.8  |
|                             | 24-36 h | 2.6   | 4.2   | 6.0   | 0.0   | 6.6   |
|                             | 36-48 h | 6.6   | 10.2  | 5.0   | 5.6   | 8.6   |
